# Supplementary material
Source: PubMed Central journal article supplement (PMC1317957)
Supplement: pnas_0509096102_2.pdf [file pnas_0509096102_2.pdf]

Overhydration (> 0% weight change)

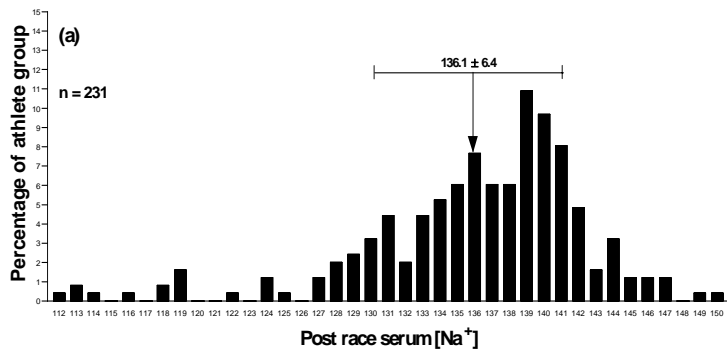

Euhydration (-0.01 to -3% weight change)

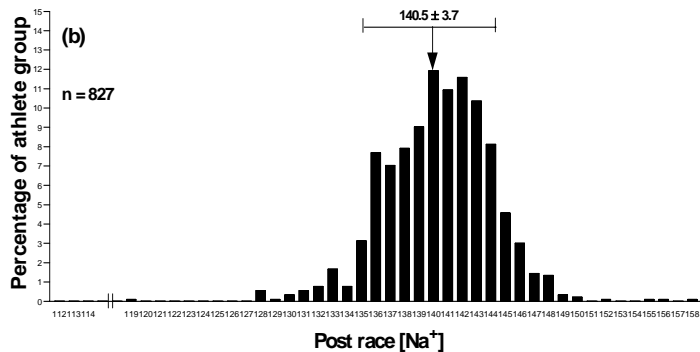

Dehydration (> -3 % weight change)

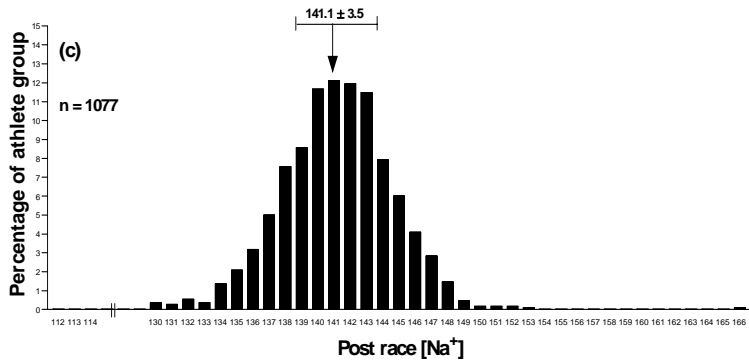

Total group

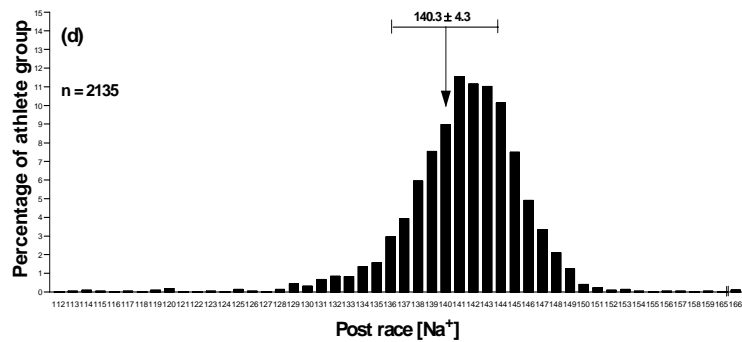

(a) vs (b) P < 0.001

(a) vs (c) P < 0.001

(b) vs (c) P < 0.001
