# Supplementary material
Source: PubMed Central journal article supplement (PMC1317957)

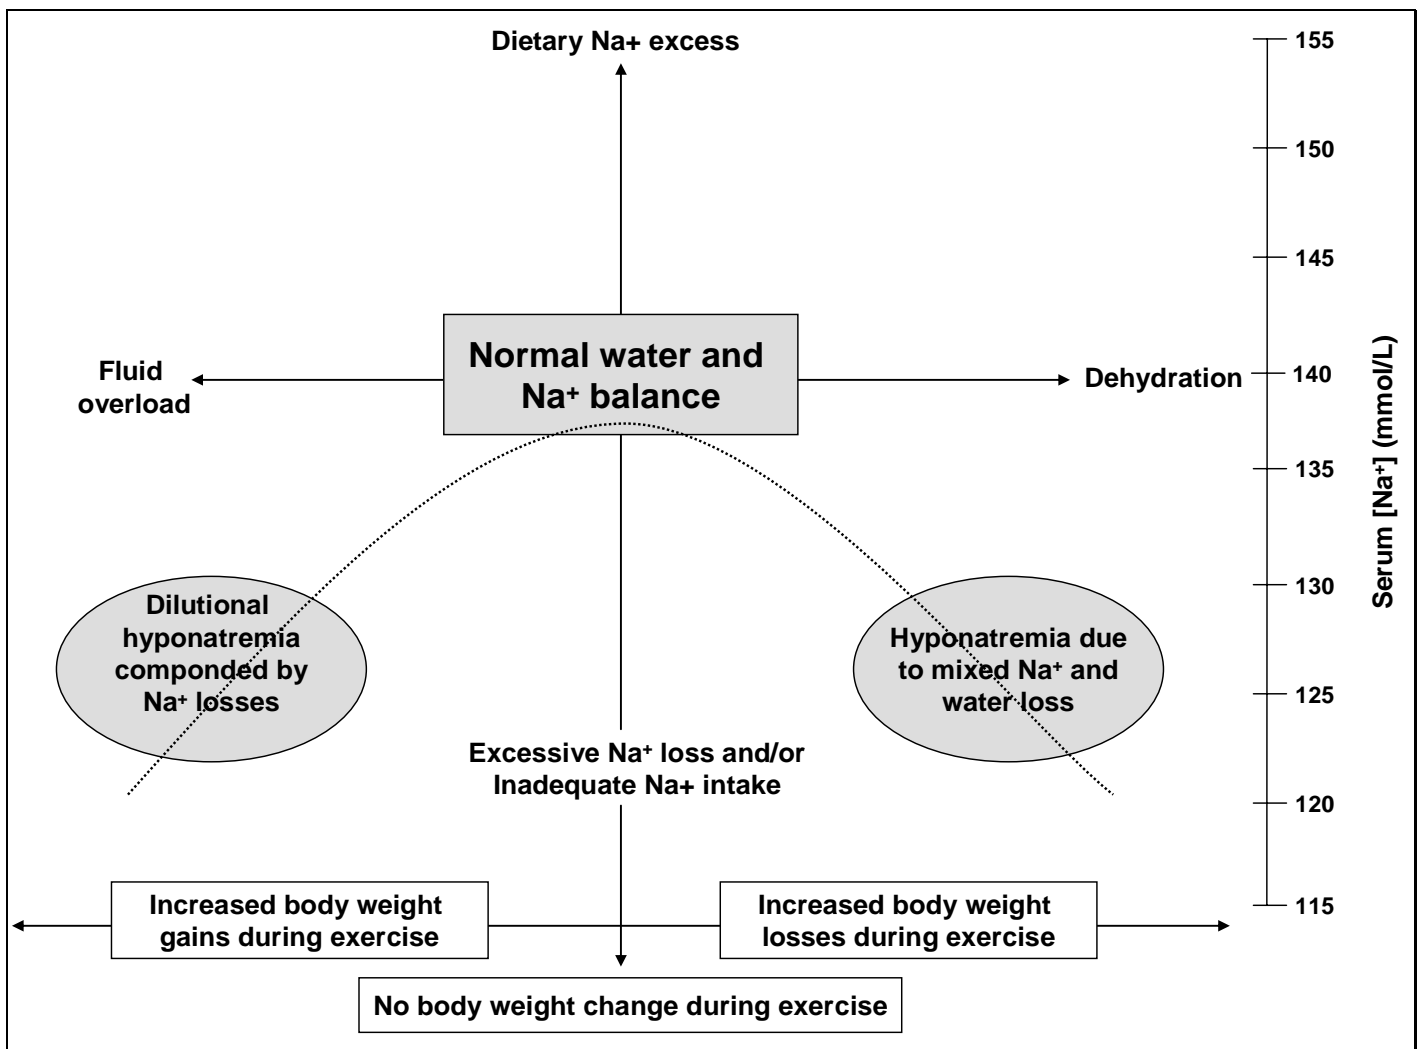

Supplement: pnas_0509096102_1.pdf [file pnas_0509096102_1.pdf]

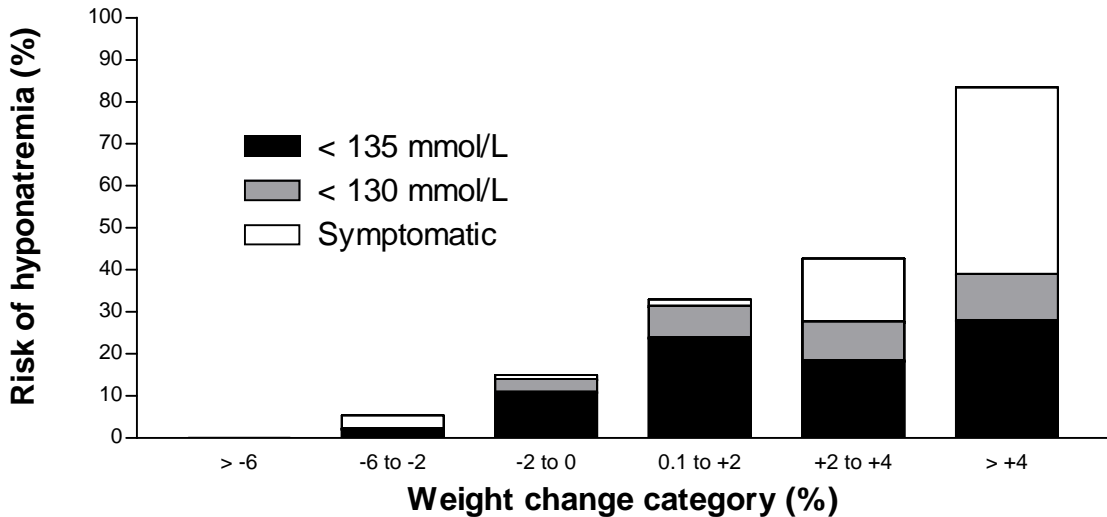

Supplement: pnas_0509096102_3.pdf [file pnas_0509096102_3.pdf]
